# Supplementary material for: Distilling universal activity descriptors for perovskite catalysts from multiple data sourcesviamulti-task symbolic regression
Source: Royal Society of Chemistry journal article supplement (doi:10.1039/d3mh00157a), 2023-01-01
Supplement: d3mh00157a2.xlsx [file d3mh00157a2.xlsx]

## Sheet: Sheet1
	Order	Materials	A site										B site																				Result										Ref/condition
			Ion		χ	Radius	Ratio	Ion		χ	Radius	Ratio	Ion	Nd	χ	Radius	Ratio	Ion	Nd	χ	Radius	Ratio	Ion	Nd	χ	Radius	Ratio	Ion	Nd	χ	Radius	Ratio	RA	RB	t	μ	μ/t	Nd	ΧA	Qa	χB	OER
1	1	LaMnO3	La3+	3	1.1	1.36	1	0	0	0	0	0	Mn3+	4	1.55	0.58	1	0	0	0	0	0	0	0	0	0	0	0	0	0	0	0	1.36	0.58	0.992881	0.42963	0.43271	4	1.1	3	1.55	1.788	wang(2020)@5 mA/cm2
1	2	LaMn0.5Ni0.5O3	La3+	3	1.1	1.36	1	0	0	0	0	0	Mn3+	4	1.55	0.58	0.5	Ni3+	7	1.91	0.56	0.5	0	0	0	0	0	0	0	0	0	0	1.36	0.57	0.998052	0.422222	0.423046	5.5	1.1	3	1.73	1.722	wang(2020)@5 mA/cm2
1	3	LaNiO3	La3+	3	1.1	1.36	1	0	0	0	0	0	Ni3+	7	1.91	0.56	1	0	0	0	0	0	0	0	0	0	0	0	0	0	0	0	1.36	0.56	1.00328	0.414815	0.41346	7	1.1	3	1.91	1.707	wang(2020)@5 mA/cm2
1	4	LaMn0.5Cu0.5O3	La3+	3	1.1	1.36	1	0	0	0	0	0	Mn4+	3	1.55	0.53	0.5	Cu2+	8	1.9	0.65	0.5	0	0	0	0	0	0	0	0	0	0	1.36	0.59	0.987763	0.437037	0.442452	5.5	1.1	3	1.725	1.774	wang(2020)@5 mA/cm2
1	5	LaNi0.9Fe0.1O3	La3+	3	1.1	1.36	1	0	0	0	0	0	Ni3+	7	1.91	0.56	0.9	Fe3+	5	1.83	0.55	0.1	0	0	0	0	0	0	0	0	0	0	1.36	0.559	1.0038	0.414074	0.412505	6.8	1.1	3	1.902	1.79	wang(2020)@5 mA/cm2
1	6	LaNi0.8Fe0.2O3	La3+	3	1.1	1.36	1	0	0	0	0	0	Ni3+	7	1.91	0.56	0.8	Fe3+	5	1.83	0.55	0.2	0	0	0	0	0	0	0	0	0	0	1.36	0.558	1.00433	0.413333	0.411552	6.6	1.1	3	1.894	1.759	wang(2020)@5 mA/cm2
1	7	LaFeO3	La3+	3	1.1	1.36	1	0	0	0	0	0	Fe3+	5	1.83	0.55	1	0	0	0	0	0	0	0	0	0	0	0	0	0	0	0	1.36	0.55	1.00856	0.407407	0.403951	5	1.1	3	1.83	1.758	wang(2020)@5 mA/cm2
1	8	La0.5Pr0.5FeO3	La3+	3	1.1	1.36	0.5	Pr3+	3	1.13	1.37	0.5	Fe3+	5	1.83	0.55	1	0	0	0	0	0	0	0	0	0	0	0	0	0	0	0	1.365	0.55	1.01042	0.407407	0.403207	5	1.115	3	1.83	1.725	wang(2020)@5 mA/cm2
1	9	PrFeO3	Pr3+	3	1.13	1.37	1	0	0	0	0	0	Fe3+	5	1.83	0.55	1	0	0	0	0	0	0	0	0	0	0	0	0	0	0	0	1.37	0.55	1.01228	0.407407	0.402465	5	1.13	3	1.83	1.758	wang(2020)@5 mA/cm2
1	10	LaCoO3	La3+	3	1.1	1.36	1	0	0	0	0	0	Co3+	6	1.88	0.545	1	0	0	0	0	0	0	0	0	0	0	0	0	0	0	0	1.36	0.545	1.01122	0.403704	0.399225	6	1.1	3	1.88	1.721	wang(2020)@5 mA/cm2
1	11	La0.5Ca0.5CoO3	La3+	3	1.1	1.36	0.5	Ca2+	2	1	1.34	0.5	Co3+	6	1.88	0.545	0.5	Co4+	5	1.88	0.53	0.5	0	0	0	0	0	0	0	0	0	0	1.35	0.5375	1.01149	0.398148	0.393625	5.5	1.05	2.5	1.88	1.682	wang(2020)@5 mA/cm2
1	12	La0.8Sr0.2CoO3	La3+	3	1.1	1.36	0.8	Sr2+	2	0.95	1.44	0.2	Co3+	6	1.88	0.545	0.8	Co4+	5	1.88	0.53	0.2	0	0	0	0	0	0	0	0	0	0	1.376	0.542	1.0188	0.401481	0.394072	5.8	1.07	2.8	1.88	1.688	wang(2020)@5 mA/cm2
1	13	Sr0.25La0.75Fe0.5Co0.5O3	Sr2+	2	0.95	1.44	0.25	La3+	3	1.1	1.36	0.75	Fe3+	5	1.83	0.55	0.35	Co3+	6	1.88	0.545	0.4	Fe4+	4	1.83	0.52	0.15	Co4+	5	1.88	0.53	0.1	1.38	0.5415	1.02057	0.401111	0.393028	5.25	1.0625	2.75	1.855	1.718	wang(2020)@5 mA/cm2
1	14	La0.4Sr0.6CoO3	La3+	3	1.1	1.36	0.4	Sr2+	2	0.95	1.44	0.6	Co3+	6	1.88	0.545	0.4	Co4+	5	1.88	0.53	0.6	0	0	0	0	0	0	0	0	0	0	1.408	0.536	1.03404	0.397037	0.383967	5.4	1.01	2.4	1.88	1.695	wang(2020)@5 mA/cm2
1	15	La0.2Sr0.8CoO3	La3+	3	1.1	1.36	0.2	Sr2+	2	0.95	1.44	0.8	Co3+	6	1.88	0.545	0.2	Co4+	5	1.88	0.53	0.8	0	0	0	0	0	0	0	0	0	0	1.424	0.533	1.0417	0.394815	0.379011	5.2	0.98	2.2	1.88	1.681	wang(2020)@5 mA/cm2
1	16	SrCoO3	Sr2+	2	0.95	1.44	1	0	0	0	0	0	Co4+	5	1.88	0.53	1	0		0	0	0	0	0	0	0	0	0	0	0	0	0	1.44	0.53	1.04938	0.392593	0.37412	5	0.95	2	1.88	1.67	wang(2020)@5 mA/cm2
1	17	Ba0.5Sr0.5Co0.8Fe0.2O3	Ba2+	2	0.89	1.61	0.5	Sr2+	2	0.95	1.44	0.5	Co4+	5	1.88	0.53	0.8	Fe4+	4	1.83	0.52	0.2	0	0	0	0	0	0	0	0	0	0	1.525	0.528	1.0825	0.391111	0.361304	4.8	0.92	2	1.87	1.639	wang(2020)@5 mA/cm2
1	18	BaFeO3	Ba2+	2	0.89	1.61	1	0	0	0	0	0	Fe4+	4	1.83	0.52	1	0		0	0	0	0	0	0	0	0	0	0	0	0	0	1.61	0.52	1.11927	0.385185	0.344139	4	0.89	2	1.83	1.686	wang(2020)@5 mA/cm2
1	19	Cs0.25La0.75Mn0.5Ni0.5O3	Cs1+	1	0.79	1.88	0.25	La3+	3	1.1	1.36	0.75	Mn3+	4	1.55	0.58	0.25	Mn4+	3	1.55	0.53	0.25	Ni4+	6	1.91	0.48	0.25	Ni3+	7	1.91	0.56	0.25	1.49	0.5375	1.06394	0.398148	0.374221	5	1.0225	2.5	1.73	1.673	wang(2020)@5 mA/cm2
1	20	Cs0.4La0.6Mn0.25Co0.75O3	Cs1+	1	0.79	1.88	0.4	La3+	3	1.1	1.36	0.6	Mn3+	4	1.55	0.58	0.1	Mn4+	3	1.55	0.53	0.15	Co3+	6	1.88	0.545	0.1	Co4+	5	1.88	0.53	0.65	1.568	0.5365	1.09374	0.397407	0.363348	4.7	0.976	2.2	1.7975	1.593	wang(2020)@5 mA/cm2
1	21	Cs0.3La0.7NiO3	Cs1+	1	0.79	1.88	0.3	La3+	3	1.1	1.36	0.7	Ni3+	7	1.91	0.56	0.4	Ni4+	6	1.91	0.48	0.6	0	0	0	0	0	0	0	0	0	0	1.516	0.512	1.08838	0.379259	0.348461	6.4	1.007	2.4	1.91	1.621	wang(2020)@5 mA/cm2
1	22	SrNi0.75Co0.25O3	Sr2+	2	0.95	1.44	1	0	0		0	0	Ni4+	6	1.91	0.48	0.75	Co4+	5	1.88	0.53	0.25	0	0	0	0	0	0	0	0	0	0	1.44	0.4925	1.07073	0.364815	0.340715	5.75	0.95	2	1.9025	1.62	wang(2020)@5 mA/cm2
1	23	Sr0.25Ba0.75NiO3	Sr2+	2	0.95	1.44	0.25	Ba2+	2	0.89	1.61	0.75	Ni4+	6	1.91	0.48	1	0	0	0	0	0	0	0	0	0	0	0	0	0	0	0	1.5675	0.48	1.12731	0.355556	0.315401	6	0.905	2	1.91	1.6	wang(2020)@5 mA/cm2
2	1	LaCoO3	La3+	3	1.1	1.36	1	0	0	0	0	0	Co3+	6	1.88	0.545	1	0	0	0	0	0	0	0	0	0	0	0	0	0	0	0	1.36	0.545	1.01122	0.403704	0.399225	6	1.1	3	1.88	1.62445	Grimaud (2013)@ 0.5 mA/cm2
2	2	La0.4Sr0.6CoO3	La3+	3	1.1	1.36	0.4	Sr2+	2	0.95	1.44	0.6	Co3+	6	1.88	0.545	0.4	Co4+	5	1.88	0.53	0.6	0	0	0	0	0	0	0	0	0	0	1.408	0.536	1.03404	0.397037	0.383967	5.4	1.01	2.4	1.88	1.58045	Grimaud (2013)@ 0.5 mA/cm2
2	3	(Gd0.5Ba0.5)CoO3	Ba2+	2	0.89	1.61	0.5	Gd3+	3	1.2	1.276	0.5	Co3+	6	1.88	0.545	0.5	Co4+	5	1.88	0.53	0.5	0	0	0	0	0	0	0	0	0	0	1.443	0.5375	1.04633	0.398148	0.380518	5.5	1.045	2.5	1.88	1.56153	Grimaud (2013)@ 0.5 mA/cm2
2	4	(Sm0.5Ba0.5)CoO3	Ba2+	2	0.89	1.61	0.5	Sm3+	3	1.17	1.24	0.5	Co3+	6	1.88	0.545	0.5	Co4+	5	1.88	0.53	0.5	0	0	0	0	0	0	0	0	0	0	1.425	0.5375	1.03959	0.398148	0.382987	5.5	1.03	2.5	1.88	1.55028	Grimaud (2013)@ 0.5 mA/cm2
2	5	(Ho0.5Ba0.5)CoO3	Ba2+	2	0.89	1.61	0.5	Ho3+	3	1.23	1.243	0.5	Co3+	6	1.88	0.545	0.5	Co4+	5	1.88	0.53	0.5	0	0	0	0	0	0	0	0	0	0	1.4265	0.5375	1.04015	0.398148	0.38278	5.5	1.06	2.5	1.88	1.53594	Grimaud (2013)@ 0.5 mA/cm2
2	6	(Pr0.5Ba0.5)CoO3	Ba2+	2	0.89	1.61	0.5	Pr3+	3	1.13	1.37	0.5	Co3+	6	1.88	0.545	0.5	Co4+	5	1.88	0.53	0.5	0	0	0	0	0	0	0	0	0	0	1.49	0.5375	1.06394	0.398148	0.374221	5.5	1.01	2.5	1.88	1.52315	Grimaud (2013)@ 0.5 mA/cm2
2	7	Ba0.5Sr0.5Co0.8Fe0.2O3	Ba2+	2	0.89	1.61	0.5	Sr2+	2	0.95	1.44	0.5	Co4+	5	1.88	0.53	0.8	Fe4+	4	1.83	0.52	0.2	0	0	0	0	0	0	0	0	0	0	1.525	0.528	1.0825	0.391111	0.361304	4.8	0.92	2	1.87	1.55539	Grimaud (2013)@ 0.5 mA/cm2
2	8	SrCo0.8Fe0.2O3	Sr2+	2	0.95	1.44	1	0	0		0	0	Fe4+	4	1.83	0.52	0.2	Co4+	5	1.88	0.53	0.8	0	0	0	0	0	0	0	0	0	0	1.44	0.528	1.05049	0.391111	0.372312	4.8	0.95	2	1.87	1.5605	Grimaud (2013)@ 0.5 mA/cm2
2	9	Ba0.5Sr0.5Co0.4Fe0.6O3	Ba2+	2	0.89	1.61	0.5	Sr2+	2	0.95	1.44	0.5	Co4+	5	1.88	0.53	0.4	Fe4+	4	1.83	0.52	0.6	0	0	0	0	0	0	0	0	0	0	1.525	0.524	1.08481	0.388148	0.357803	4.4	0.92	2	1.85	1.58917	Grimaud (2013)@ 0.5 mA/cm2
																																								0
3	1	La0.4Sr0.6FeO3	La3+	3	1.1	1.36	0.4	Sr2+	2	0.95	1.44	0.6	Fe3+	5	1.83	0.55	0.4	Fe4+	4	1.83	0.52	0.6	0	0	0	0	0	0	0	0	0	0	1.408	0.532	1.03624	0.394074	0.380293	4.4	1.01	2.4	1.83	-0.622	Matsumoto (1980)@ 40 mA/cm2
3	2	La0.2Sr0.8FeO3	La3+	3	1.1	1.36	0.2	Sr2+	2	0.95	1.44	0.8	Fe3+	5	1.83	0.55	0.2	Fe4+	4	1.83	0.52	0.8	0	0	0	0	0	0	0	0	0	0	1.424	0.526	1.04558	0.38963	0.372643	4.2	0.98	2.2	1.83	-0.502	Matsumoto (1980)@ 40 mA/cm2
3	3	La0.6Sr0.4Fe0.8Co0.2O3	Sr2+	2	0.95	1.44	0.4	La3+	3	1.1	1.36	0.6	Fe3+	5	1.83	0.55	0.48	Co3+	6	1.88	0.545	0.12	Fe4+	4	1.83	0.52	0.32	Co4+	5	1.88	0.53	0.08	1.392	0.5382	1.02684	0.398667	0.388245	4.8	1.04	2.6	1.84	-0.492	Matsumoto (1980)@ 40 mA/cm2
3	4	La0.2Sr0.8Fe0.8Co0.2O3	Sr2+	2	0.95	1.44	0.8	La3+	3	1.1	1.36	0.2	Fe3+	5	1.83	0.55	0.16	Co3+	6	1.88	0.545	0.04	Fe4+	4	1.83	0.52	0.64	Co4+	5	1.88	0.53	0.16	1.424	0.5274	1.0448	0.390667	0.373914	4.4	0.98	2.2	1.84	-0.462	Matsumoto (1980)@ 40 mA/cm2
3	5	La0.8Sr0.2Fe0.7Co0.3O3	Sr2+	2	0.95	1.44	0.2	La3+	3	1.1	1.36	0.8	Fe3+	5	1.83	0.55	0.56	Co3+	6	1.88	0.545	0.24	Fe4+	4	1.83	0.52	0.14	Co4+	5	1.88	0.53	0.06	1.376	0.5434	1.01805	0.402519	0.395382	5.1	1.07	2.8	1.845	-0.587	Matsumoto (1980)@ 40 mA/cm2
3	6	La0.2Sr0.8Fe0.6Co0.4O3	Sr2+	2	0.95	1.44	0.8	La3+	3	1.1	1.36	0.2	Fe3+	5	1.83	0.55	0.12	Co3+	6	1.88	0.545	0.08	Fe4+	4	1.83	0.52	0.48	Co4+	5	1.88	0.53	0.32	1.424	0.5288	1.04403	0.391704	0.375186	4.6	0.98	2.2	1.85	-0.417	Matsumoto (1980)@ 40 mA/cm2
3	7	La0.8Sr0.2Fe0.4Co0.6O3	Sr2+	2	0.95	1.44	0.2	La3+	3	1.1	1.36	0.8	Fe3+	5	1.83	0.55	0.32	Co3+	6	1.88	0.545	0.48	Fe4+	4	1.83	0.52	0.08	Co4+	5	1.88	0.53	0.12	1.376	0.5428	1.01837	0.402074	0.394821	5.4	1.07	2.8	1.86	-0.502	Matsumoto (1980)@ 40 mA/cm2
3	8	La0.4Sr0.6Fe0.4Co0.6O3	Sr2+	2	0.95	1.44	0.6	La3+	3	1.1	1.36	0.4	Fe3+	5	1.83	0.55	0.16	Co3+	6	1.88	0.545	0.24	Fe4+	4	1.83	0.52	0.24	Co4+	5	1.88	0.53	0.36	1.408	0.5344	1.03492	0.395852	0.382496	5	1.01	2.4	1.86	-0.452	Matsumoto (1980)@ 40 mA/cm2
3	9	La0.4Sr0.6Fe0.2Co0.8O3	Sr2+	2	0.95	1.44	0.6	La3+	3	1.1	1.36	0.4	Fe3+	5	1.83	0.55	0.08	Co3+	6	1.88	0.545	0.32	Fe4+	4	1.83	0.52	0.12	Co4+	5	1.88	0.53	0.48	1.408	0.5352	1.03448	0.396444	0.383231	5.2	1.01	2.4	1.87	-0.492	Matsumoto (1980)@ 40 mA/cm2
3	10	La0.2Sr0.8Fe0.2Co0.8O3	Sr2+	2	0.95	1.44	0.8	La3+	3	1.1	1.36	0.2	Fe3+	5	1.83	0.55	0.04	Co3+	6	1.88	0.545	0.16	Fe4+	4	1.83	0.52	0.16	Co4+	5	1.88	0.53	0.64	1.424	0.5316	1.04247	0.393778	0.377735	5	0.98	2.2	1.87	-0.497	Matsumoto (1980)@ 40 mA/cm2
3	11	La0.8Sr0.2Fe0.1Co0.9O3	Sr2+	2	0.95	1.44	0.2	La3+	3	1.1	1.36	0.8	Fe3+	5	1.83	0.55	0.08	Co3+	6	1.88	0.545	0.72	Fe4+	4	1.83	0.52	0.02	Co4+	5	1.88	0.53	0.18	1.376	0.5422	1.01869	0.40163	0.394259	5.7	1.07	2.8	1.875	-0.452	Matsumoto (1980)@ 40 mA/cm2
3	12	La0.6Sr0.4Fe0.1Co0.9O3	Sr2+	2	0.95	1.44	0.4	La3+	3	1.1	1.36	0.6	Fe3+	5	1.83	0.55	0.06	Co3+	6	1.88	0.545	0.54	Fe4+	4	1.83	0.52	0.04	Co4+	5	1.88	0.53	0.36	1.392	0.5389	1.02646	0.399185	0.388894	5.5	1.04	2.6	1.875	-0.402	Matsumoto (1980)@ 40 mA/cm2
3	13	LaCoO3	La3+	3	1.1	1.36	1	0	0	0	0	0	Co3+	6	1.88	0.545	1	0	0	0	0	0	0	0	0	0	0	0	0	0	0	0	1.36	0.545	1.01122	0.403704	0.399225	6	1.1	3	1.88	-0.577	Matsumoto (1980)@ 40 mA/cm2
3	14	La0.8Sr0.2CoO3	La3+	3	1.1	1.36	0.8	Sr2+	2	0.95	1.44	0.2	Co3+	6	1.88	0.545	0.8	Co4+	5	1.88	0.53	0.2	0	0	0	0	0	0	0	0	0	0	1.376	0.542	1.0188	0.401481	0.394072	5.8	1.07	2.8	1.88	-0.54	Matsumoto (1980)@ 40 mA/cm2
3	15	La0.6Sr0.4CoO3	La3+	3	1.1	1.36	0.6	Sr2+	2	0.95	1.44	0.4	Co3+	6	1.88	0.545	0.6	Co4+	5	1.88	0.53	0.4	0	0	0	0	0	0	0	0	0	0	1.392	0.539	1.02641	0.399259	0.388986	5.6	1.04	2.6	1.88	-0.5	Matsumoto (1980)@ 40 mA/cm2
3	16	La0.3Sr0.7CoO3	La3+	3	1.1	1.36	0.2	Sr2+	2	0.95	1.44	0.7	Co3+	6	1.88	0.545	0.3	Co4+	5	1.88	0.53	0.7	0	0	0	0	0	0	0	0	0	0	1.28	0.5345	0.986835	0.395926	0.401208	5.3	0.885	2	1.88	-0.462	Matsumoto (1980)@ 40 mA/cm2
4	1	La0.4Sr0.6FeO3	La3+	3	1.1	1.36	0.4	Sr2+	2	0.95	1.44	0.6	Fe3+	5	1.83	0.55	0.4	Fe4+	4	1.83	0.52	0.6	0	0	0	0	0	0	0	0	0	0	1.408	0.532	1.03624	0.394074	0.380293	4.4	1.01	2.4	1.83	-0.687	Matsumoto (1980)@ 60 mA/cm2
4	2	La0.2Sr0.8FeO3	La3+	3	1.1	1.36	0.2	Sr2+	2	0.95	1.44	0.8	Fe3+	5	1.83	0.55	0.2	Fe4+	4	1.83	0.52	0.8	0	0	0	0	0	0	0	0	0	0	1.424	0.526	1.04558	0.38963	0.372643	4.2	0.98	2.2	1.83	-0.542	Matsumoto (1980)@ 60 mA/cm2
4	3	La0.6Sr0.4Fe0.8Co0.2O3	Sr2+	2	0.95	1.44	0.4	La3+	3	1.1	1.36	0.6	Fe3+	5	1.83	0.55	0.48	Co3+	6	1.88	0.545	0.12	Fe4+	4	1.83	0.52	0.32	Co4+	5	1.88	0.53	0.08	1.392	0.5382	1.02684	0.398667	0.388245	4.8	1.04	2.6	1.84	-0.537	Matsumoto (1980)@ 60 mA/cm2
4	4	La0.2Sr0.8Fe0.8Co0.2O3	Sr2+	2	0.95	1.44	0.8	La3+	3	1.1	1.36	0.2	Fe3+	5	1.83	0.55	0.16	Co3+	6	1.88	0.545	0.04	Fe4+	4	1.83	0.52	0.64	Co4+	5	1.88	0.53	0.16	1.424	0.5274	1.0448	0.390667	0.373914	4.4	0.98	2.2	1.84	-0.497	Matsumoto (1980)@ 60 mA/cm2
4	5	La0.8Sr0.2Fe0.7Co0.3O3	Sr2+	2	0.95	1.44	0.2	La3+	3	1.1	1.36	0.8	Fe3+	5	1.83	0.55	0.56	Co3+	6	1.88	0.545	0.24	Fe4+	4	1.83	0.52	0.14	Co4+	5	1.88	0.53	0.06	1.376	0.5434	1.01805	0.402519	0.395382	5.1	1.07	2.8	1.845	-0.657	Matsumoto (1980)@ 60 mA/cm2
4	6	La0.2Sr0.8Fe0.6Co0.4O3	Sr2+	2	0.95	1.44	0.8	La3+	3	1.1	1.36	0.2	Fe3+	5	1.83	0.55	0.12	Co3+	6	1.88	0.545	0.08	Fe4+	4	1.83	0.52	0.48	Co4+	5	1.88	0.53	0.32	1.424	0.5288	1.04403	0.391704	0.375186	4.6	0.98	2.2	1.85	-0.457	Matsumoto (1980)@ 60 mA/cm2
4	7	La0.8Sr0.2Fe0.4Co0.6O3	Sr2+	2	0.95	1.44	0.2	La3+	3	1.1	1.36	0.8	Fe3+	5	1.83	0.55	0.32	Co3+	6	1.88	0.545	0.48	Fe4+	4	1.83	0.52	0.08	Co4+	5	1.88	0.53	0.12	1.376	0.5428	1.01837	0.402074	0.394821	5.4	1.07	2.8	1.86	-0.542	Matsumoto (1980)@ 60 mA/cm2
4	8	La0.4Sr0.6Fe0.4Co0.6O3	Sr2+	2	0.95	1.44	0.6	La3+	3	1.1	1.36	0.4	Fe3+	5	1.83	0.55	0.16	Co3+	6	1.88	0.545	0.24	Fe4+	4	1.83	0.52	0.24	Co4+	5	1.88	0.53	0.36	1.408	0.5344	1.03492	0.395852	0.382496	5	1.01	2.4	1.86	-0.492	Matsumoto (1980)@ 60 mA/cm2
4	9	La0.4Sr0.6Fe0.2Co0.8O3	Sr2+	2	0.95	1.44	0.6	La3+	3	1.1	1.36	0.4	Fe3+	5	1.83	0.55	0.08	Co3+	6	1.88	0.545	0.32	Fe4+	4	1.83	0.52	0.12	Co4+	5	1.88	0.53	0.48	1.408	0.5352	1.03448	0.396444	0.383231	5.2	1.01	2.4	1.87	-0.487	Matsumoto (1980)@ 60 mA/cm2
4	10	La0.2Sr0.8Fe0.2Co0.8O3	Sr2+	2	0.95	1.44	0.8	La3+	3	1.1	1.36	0.2	Fe3+	5	1.83	0.55	0.04	Co3+	6	1.88	0.545	0.16	Fe4+	4	1.83	0.52	0.16	Co4+	5	1.88	0.53	0.64	1.424	0.5316	1.04247	0.393778	0.377735	5	0.98	2.2	1.87	-0.432	Matsumoto (1980)@ 60 mA/cm2
4	11	La0.8Sr0.2Fe0.1Co0.9O3	Sr2+	2	0.95	1.44	0.2	La3+	3	1.1	1.36	0.8	Fe3+	5	1.83	0.55	0.08	Co3+	6	1.88	0.545	0.72	Fe4+	4	1.83	0.52	0.02	Co4+	5	1.88	0.53	0.18	1.376	0.5422	1.01869	0.40163	0.394259	5.7	1.07	2.8	1.875	-0.532	Matsumoto (1980)@ 60 mA/cm2
4	12	La0.6Sr0.4Fe0.1Co0.9O3	Sr2+	2	0.95	1.44	0.4	La3+	3	1.1	1.36	0.6	Fe3+	5	1.83	0.55	0.06	Co3+	6	1.88	0.545	0.54	Fe4+	4	1.83	0.52	0.04	Co4+	5	1.88	0.53	0.36	1.392	0.5389	1.02646	0.399185	0.388894	5.5	1.04	2.6	1.875	-0.532	Matsumoto (1980)@ 60 mA/cm2
4	13	LaCoO3	La3+	3	1.1	1.36	1	0	0	0	0	0	Co3+	6	1.88	0.545	1	0	0	0	0	0	0	0	0	0	0	0	0	0	0	0	1.36	0.545	1.01122	0.403704	0.399225	6	1.1	3	1.88	-0.627	Matsumoto (1980)@ 60 mA/cm2
4	14	La0.8Sr0.2CoO3	La3+	3	1.1	1.36	0.8	Sr2+	2	0.95	1.44	0.2	Co3+	6	1.88	0.545	0.8	Co4+	5	1.88	0.53	0.2	0	0	0	0	0	0	0	0	0	0	1.376	0.542	1.0188	0.401481	0.394072	5.8	1.07	2.8	1.88	-0.572	Matsumoto (1980)@ 60 mA/cm2
4	15	La0.6Sr0.4CoO3	La3+	3	1.1	1.36	0.6	Sr2+	2	0.95	1.44	0.4	Co3+	6	1.88	0.545	0.6	Co4+	5	1.88	0.53	0.4	0	0	0	0	0	0	0	0	0	0	1.392	0.539	1.02641	0.399259	0.388986	5.6	1.04	2.6	1.88	-0.527	Matsumoto (1980)@ 60 mA/cm2
4	16	La0.3Sr0.7CoO3	La3+	3	1.1	1.36	0.3	Sr2+	2	0.95	1.44	0.7	Co3+	6	1.88	0.545	0.3	Co4+	5	1.88	0.53	0.7	0	0	0	0	0	0	0	0	0	0	1.416	0.5345	1.03787	0.395926	0.381481	5.3	0.995	2.3	1.88	-0.492	Matsumoto (1980)@ 60 mA/cm2
5	1	LaCoO3	La3+	3	1.1	1.36	1	0	0	0	0	0	Co3+	6	1.88	0.545	1	0	0	0	0	0	0	0	0	0	0	0	0	0	0	0	1.36	0.545	1.01122	0.403704	0.399225	6	1.1	3	1.88	-0.341	Jain (1995)@ 10 mA/cm2 (mV)
5	2	La0.8Sr0.2CoO3	La3+	3	1.1	1.36	0.8	Sr2+	2	0.95	1.44	0.2	Co3+	6	1.88	0.545	0.8	Co4+	5	1.88	0.53	0.2	0	0	0	0	0	0	0	0	0	0	1.376	0.542	1.0188	0.401481	0.394072	5.8	1.07	2.8	1.88	-0.293	Jain (1995)@ 10 mA/cm2 (mV)
5	3	La0.8Ca0.2CoO3	La3+	3	1.1	1.36	0.8	Ca2+	2	1	1.34	0.2	Co3+	6	1.88	0.545	0.8	Co4+	5	1.88	0.53	0.2	0	0	0	0	0	0	0	0	0	0	1.356	0.542	1.01133	0.401481	0.396985	5.8	1.08	2.8	1.88	-0.327	Jain (1995)@ 10 mA/cm2 (mV)
5	4	La0.6Sr0.4CoO3	La3+	3	1.1	1.36	0.6	Sr2+	2	0.95	1.44	0.4	Co3+	6	1.88	0.545	0.6	Co4+	5	1.88	0.53	0.4	0	0	0	0	0	0	0	0	0	0	1.392	0.539	1.02641	0.399259	0.388986	5.6	1.04	2.6	1.88	-0.278	Jain (1995)@ 10 mA/cm2 (mV)
6	1	La0.5Ca0.5CoO3	La3+	3	1.1	1.36	0.8	Ca2+	2	1	1.34	0.2	Co3+	6	1.88	0.545	0.8	Co4+	5	1.88	0.53	0.2	0	0	0	0	0	0	0	0	0	0	1.356	0.542	1.01133	0.401481	0.396985	5.8	1.08	2.8	1.88	-0.2218	Suntivich (2012)@ 1.6 V vs. RHE
6	2	La0.75Ca0.25FeO3	La3+	3	1.1	1.36	0.75	Ca2+	2	1	1.34	0.25	Fe3+	5	1.83	0.55	0.75	Fe4+	4	1.83	0.52	0.25	0	0	0	0	0	0	0	0	0	0	1.355	0.5425	1.01069	0.401852	0.397603	4.75	1.075	2.75	1.83	-1.0458	Suntivich (2012)@ 1.6 V vs. RHE
6	3	LaMn0.5Cu0.5O3	La3+	3	1.1	1.36	1						Mn3+	4	1.55	0.58	0.5	Cu3+	8	1.9	0.54	0.5	0	0	0	0	0	0	0	0	0	0	1.36	0.56	1.00328	0.414815	0.41346	6	1.1	3	1.725	-1.3979	Suntivich (2012)@ 1.6 V vs. RHE
6	4	LaMnO3+d	La3+	3	1.1	1.36	1						Mn3+	4	1.55	0.58	1						0	0	0	0	0	0	0	0	0	0	1.36	0.58	0.992881	0.42963	0.43271	4	1.1	3	1.55	-1.301	Suntivich (2012)@ 1.6 V vs. RHE
6	5	La0.5Ca0.5FeO3	La3+	3	1.1	1.36	0.5	Ca2+	2	1	1.34	0.5	Fe3+	5	1.83	0.55	0.5	Fe4+	4	1.83	0.52	0.5	0	0	0	0	0	0	0	0	0	0	1.35	0.535	1.01283	0.396296	0.391275	4.5	1.05	2.5	1.83	-0.0458	Suntivich (2012)@ 1.6 V vs. RHE
6	6	La0.5Ca0.5MnO3	La3+	3	1.1	1.36	0.5	Ca2+	2	1	1.34	0.5	Mn3+	4	1.55	0.58	0.5	Mn4+	3	1.88	0.53	0.5	0	0	0	0	0	0	0	0	0	0	1.35	0.555	1.0022	0.411111	0.410209	3.5	1.05	2.5	1.715	-1.3979	Suntivich (2012)@ 1.6 V vs. RHE
6	7	LaMn0.5Ni0.5O3	La3+	3	1.1	1.36	1						Mn3+	4	1.55	0.58	0.5	Ni3+	7	1.91	0.56	0.5	0	0	0	0	0	0	0	0	0	0	1.36	0.57	0.998052	0.422222	0.423046	5.5	1.1	3	1.73	-1	Suntivich (2012)@ 1.6 V vs. RHE
6	8	LaCoO3	La3+	3	1.1	1.36	1	0	0	0	0	0	Co3+	6	1.88	0.545	1	0	0	0	0		0	0	0	0	0	0	0	0	0	0	1.36	0.545	1.01122	0.403704	0.399225	6	1.1	3	1.88	-0.8539	Suntivich (2012)@ 1.6 V vs. RHE
6	9	LaCrO3	La3+	3	1.1	1.36	1	0	0	0	0	0	Cr3+	3	1.66	0.615	1	0	0	0	0	0	0	0	0	0	0	0	0	0	0	0	1.36	0.615	0.975196	0.455556	0.467143	3	1.1	3	1.66	-1.699	Suntivich (2012)@ 1.6 V vs. RHE
6	10	LaFeO3	La3+	3	1.1	1.36	1	0	0	0	0	0	Fe3+	5	1.83	0.55	1	0	0	0	0	0	0	0	0	0	0	0	0	0	0	0	1.36	0.55	1.00856	0.407407	0.403951	5	1.1	3	1.83	-1.3979	Suntivich (2012)@ 1.6 V vs. RHE
6	11	LaMnO3	La3+	3	1.1	1.36	1	0	0	0	0	0	Mn3+	4	1.55	0.58	1	0	0	0	0	0	0	0	0	0	0	0	0	0	0	0	1.36	0.58	0.992881	0.42963	0.43271	4	1.1	3	1.55	-1.301	Suntivich (2012)@ 1.6 V vs. RHE
6	12	LaNiO3	La3+	3	1.1	1.36	1	0	0	0	0	0	Ni3+	7	1.91	0.56	1	0	0	0	0	0	0	0	0	0	0	0	0	0	0	0	1.36	0.56	1.00328	0.414815	0.41346	7	1.1	3	1.91	-0.7959	Suntivich (2012)@ 1.6 V vs. RHE
6	13	La0.5Ca0.5CrO3	La3+	3	1.1	1.36	0.5	Ca2+	2	1	1.34	0.5	Cr3+	3	1.66	0.615	0.5	Cr4+	2	1.66	0.55	0.5	0	0	0	0	0	0	0	0	0	0	1.35	0.5825	0.987937	0.431481	0.43675	2.5	1.05	2.5	1.66	-1.5229	Suntivich (2012)@ 1.6 V vs. RHE
7	1	GdBaCo2O5	Ba2+	2	0.89	1.61	0.5	Gd3+	3	1.2	1.276	0.5	Co3+	6	1.88	0.545	0.5	Co4+	5	1.88	0.53	0.5	0	0	0	0	0	0	0	0	0	0	1.443	0.5375	1.04633	0.398148	0.380518	5.5	1.045	2.5	1.88	-0.33	Grimaud (2013)@ 0.5 mA/cm2
7	2	HoBaCo2O5	Ba2+	2	0.89	1.61	0.5	Ho3+	3	1.23	1.243	0.5	Co3+	6	1.88	0.545	0.5	Co4+	5	1.88	0.53	0.5	0	0	0	0	0	0	0	0	0	0	1.4265	0.5375	1.04015	0.398148	0.38278	5.5	1.06	2.5	1.88	-0.305	Grimaud (2013)@ 0.5 mA/cm2
7	3	PrBaCo2O5	Ba2+	2	0.89	1.61	0.5	Pr3+	3	1.13	1.37	0.5	Co3+	6	1.88	0.545	0.5	Co4+	5	1.88	0.53	0.5	0	0	0	0	0	0	0	0	0	0	1.49	0.5375	1.06394	0.398148	0.374221	5.5	1.01	2.5	1.88	-0.29	Grimaud (2013)@ 0.5 mA/cm2
7	4	SmBaCo2O5	Ba2+	2	0.89	1.61	0.5	Sm3+	3	1.17	1.24	0.5	Co3+	6	1.88	0.545	0.5	Co4+	5	1.88	0.53	0.5	0	0	0	0	0	0	0	0	0	0	1.425	0.5375	1.03959	0.398148	0.382987	5.5	1.03	2.5	1.88	-0.32	Grimaud (2013)@ 0.5 mA/cm2
7	5	La0.4Sr0.6CoO3	La3+	3	1.1	1.36	0.4	Sr2+	2	0.95	1.44	0.6	Co3+	6	1.88	0.545	0.4	Co4+	5	1.88	0.53	0.6	0	0	0	0	0	0	0	0	0	0	1.408	0.536	1.03404	0.397037	0.383967	5.4	1.01	2.4	1.88	-0.35	Grimaud (2013)@ 0.5 mA/cm2
7	6	LaCoO3	La3+	3	1.1	1.36	1	0	0	0	0	0	Co3+	6	1.88	0.545	1	0	0	0	0	0	0	0	0	0	0	0	0	0	0	0	1.36	0.545	1.01122	0.403704	0.399225	6	1.1	3	1.88	-0.395	Grimaud (2013)@ 0.5 mA/cm2
8	1	GdBaCo2O5	Ba2+	2	0.89	1.61	0.5	Gd3+	3	1.2	1.276	0.5	Co3+	6	1.88	0.545	0.5	Co4+	5	1.88	0.53	0.5	0	0	0	0	0	0	0	0	0	0	1.443	0.5375	1.04633	0.398148	0.380518	5.5	1.045	2.5	1.88	0.4314	Grimaud (2013)@ 1.6 V vs. RHE
8	2	HoBaCo2O5	Ba2+	2	0.89	1.61	0.5	Ho3+	3	1.23	1.243	0.5	Co3+	6	1.88	0.545	0.5	Co4+	5	1.88	0.53	0.5	0	0	0	0	0	0	0	0	0	0	1.4265	0.5375	1.04015	0.398148	0.38278	5.5	1.06	2.5	1.88	0.699	Grimaud (2013)@ 1.6 V vs. RHE
8	3	PrBaCo2O5	Ba2+	2	0.89	1.61	0.5	Pr3+	3	1.13	1.37	0.5	Co3+	6	1.88	0.545	0.5	Co4+	5	1.88	0.53	0.5	0	0	0	0	0	0	0	0	0	0	1.49	0.5375	1.06394	0.398148	0.374221	5.5	1.01	2.5	1.88	0.9609	Grimaud (2013)@ 1.6 V vs. RHE
8	4	SmBaCo2O5	Ba2+	2	0.89	1.61	0.5	Sm3+	3	1.17	1.24	0.5	Co3+	6	1.88	0.545	0.5	Co4+	5	1.88	0.53	0.5	0	0	0	0	0	0	0	0	0	0	1.425	0.5375	1.03959	0.398148	0.382987	5.5	1.03	2.5	1.88	0.5527	Grimaud (2013)@ 1.6 V vs. RHE
8	5	La0.4Sr0.6CoO3	La3+	3	1.1	1.36	0.4	Sr2+	2	0.95	1.44	0.6	Co3+	6	1.88	0.545	0.4	Co4+	5	1.88	0.53	0.6	0	0	0	0	0	0	0	0	0	0	1.408	0.536	1.03404	0.397037	0.383967	5.4	1.01	2.4	1.88	-0.3098	Grimaud (2013)@ 1.6 V vs. RHE
8	6	LaCoO3	La3+	3	1.1	1.36	1	0	0	0	0	0	Co3+	6	1.88	0.545	1	0	0	0	0	0	0	0	0	0	0	0	0	0	0	0	1.36	0.545	1.01122	0.403704	0.399225	6	1.1	3	1.88	-0.8539	Grimaud (2013)@ 1.6 V vs. RHE
9	1	LaCrO3	La3+	3	1.1	1.36	1	0	0	0	0	0	Cr3+	3	1.66	0.615	1	0	0	0	0	0	0	0	0	0	0	0	0	0	0	0	1.36	0.615	0.975196	0.455556	0.467143	3	1.1	3	1.66	−1.07	Wesley(2017)@ 1.6 V vs. RHE
9	2	LaMnO3+δ	La3+	3	1.1	1.36	1	0	0	0	0	0	Mn3+	4	1.55	0.58	1	0	0	0	0	0	0	0	0	0	0	0	0	0	0	0	1.36	0.58	0.992881	0.42963	0.43271	4	1.1	3	1.55	−0.57	Wesley(2017)@ 1.6 V vs. RHE
9	3	LaFeO3	La3+	3	1.1	1.36	1	0	0	0	0	0	Fe3+	5	1.83	0.55	1	0	0	0	0	0	0	0	0	0	0	0	0	0	0	0	1.36	0.55	1.00856	0.407407	0.403951	5	1.1	3	1.83	−0.71	Wesley(2017)@ 1.6 V vs. RHE
9	4	LaCoO3	La3+	3	1.1	1.36	1	0	0	0	0	0	Co3+	6	1.88	0.545	1	0	0	0	0	0	0	0	0	0	0	0	0	0	0	0	1.36	0.545	1.01122	0.403704	0.399225	6	1.1	3	1.88	−0.53	Wesley(2017)@ 1.6 V vs. RHE
9	5	LaNiO3-δ	La3+	3	1.1	1.36	1	0	0	0	0	0	Ni3+	7	1.91	0.56	1	0	0	0	0	0	0	0	0	0	0	0	0	0	0	0	1.36	0.56	1.00328	0.414815	0.41346	7	1.1	3	1.91	−0.07	Wesley(2017)@ 1.6 V vs. RHE
9	6	La0.8Sr0.2CoO3−δ	La3+	3	1.1	1.36	0.8	Sr2+	2	0.95	1.44	0.2	Co3+	6	1.88	0.545	0.8	Co4+	5	1.88	0.53	0.2	0	0	0	0	0	0	0	0	0	0	1.376	0.542	1.0188	0.401481	0.394072	5.8	1.07	2.8	1.88	−0.15	Wesley(2017)@ 1.6 V vs. RHE
9	7	La0.5Sr0.5CoO3−δ	La3+	3	1.1	1.36	0.5	Sr2+	2	0.95	1.44	0.5	Co3+	6	1.88	0.545	0.5	Co4+	5	1.88	0.53	0.5	0	0	0	0	0	0	0	0	0	0	1.4	0.5375	1.03022	0.398148	0.386468	5.5	1.025	2.5	1.88	0.64	Wesley(2017)@ 1.6 V vs. RHE
9	8	GdBaCo2O5+δ	Ba2+	2	0.89	1.61	0.5	Gd3+	3	1.2	1.276	0.5	Co3+	6	1.88	0.545	0.5	Co4+	5	1.88	0.53	0.5	0	0	0	0	0	0	0	0	0	0	1.443	0.5375	1.04633	0.398148	0.380518	5.5	1.045	2.5	1.88	0.39	Wesley(2017)@ 1.6 V vs. RHE
9	9	SmBaCo2O5+δ	Ba2+	2	0.89	1.61	0.5	Sm3+	3	1.17	1.24	0.5	Co3+	6	1.88	0.545	0.5	Co4+	5	1.88	0.53	0.5	0	0	0	0	0	0	0	0	0	0	1.425	0.5375	1.03959	0.398148	0.382987	5.5	1.03	2.5	1.88	0.5	Wesley(2017)@ 1.6 V vs. RHE
9	10	PrBaCo2O5+δ	Ba2+	2	0.89	1.61	0.5	Pr3+	3	1.13	1.37	0.5	Co3+	6	1.88	0.545	0.5	Co4+	5	1.88	0.53	0.5	0	0	0	0	0	0	0	0	0	0	1.49	0.5375	1.06394	0.398148	0.374221	5.5	1.01	2.5	1.88	0.86	Wesley(2017)@ 1.6 V vs. RHE
10	1	LaCrO3	La3+	3	1.1	1.36	1	0	0	0	0	0	Cr3+	3	1.66	0.615	1	0	0	0	0	0	0	0	0	0	0	0	0	0	0	0	1.36	0.615	0.975196	0.455556	0.467143	3	1.1	3	1.66	1.758	Suntivich (2011)@ 0.5 mA/cm2
10	2	LaMnO3	La3+	3	1.1	1.36	1	0	0	0	0	0	Mn3+	4	1.55	0.58	1	0	0	0	0	0	0	0	0	0	0	0	0	0	0	0	1.36	0.58	0.992881	0.42963	0.43271	4	1.1	3	1.55	1.633	Suntivich (2011)@ 0.5 mA/cm2
10	3	LaMn0.5Cu0.5O3	La3+	3	1.1	1.36	1	0	0	0	0	0	Mn4+	3	1.55	0.53	0.5	Cu2+	8	1.9	0.65	0.5	0	0	0	0	0	0	0	0	0	0	1.36	0.59	0.987763	0.437037	0.442452	5.5	1.1	3	1.725	1.623	Suntivich (2011)@ 0.5 mA/cm2
10	4	La0.5Ca0.5MnO3	La3+	3	1.1	1.36	0.5	Ca2+	2	1	1.34	0.5	Mn3+	4	1.55	0.58	0.5	Mn4+	3	1.88	0.53	0.5	0	0	0	0	0	0	0	0	0	0	1.35	0.555	1.0022	0.411111	0.410209	3.5	1.05	2.5	1.715	1.594	Suntivich (2011)@ 0.5 mA/cm2
10	5	LaCoO3	La3+	3	1.1	1.36	1	0	0	0	0	0	Co3+	6	1.88	0.545	1	0	0	0	0	0	0	0	0	0	0	0	0	0	0	0	1.36	0.545	1.01122	0.403704	0.399225	6	1.1	3	1.88	1.577	Suntivich (2011)@ 0.5 mA/cm2
10	6	LaNiO3	La3+	3	1.1	1.36	1	0	0	0	0	0	Ni3+	7	1.91	0.56	1	0	0	0	0	0	0	0	0	0	0	0	0	0	0	0	1.36	0.56	1.00328	0.414815	0.41346	7	1.1	3	1.91	1.557	Suntivich (2011)@ 0.5 mA/cm2
10	7	BSCF	Ba2+	2	0.89	1.61	0.5	Sr2+	2	0.95	1.44	0.5	Co4+	5	1.88	0.53	0.8	Fe4+	4	1.83	0.52	0.2	0	0	0	0	0	0	0	0	0	0	1.525	0.528	1.0825	0.391111	0.361304	4.8	0.92	2	1.87	1.483	Suntivich (2011)@ 0.5 mA/cm2
10	8	La0.5Ca0.5CoO3	La3+	3	1.1	1.36	0.5	Ca2+	2	1	1.34	0.5	Co3+	6	1.88	0.545	0.5	Co4+	5	1.88	0.53	0.5	0	0	0	0	0	0	0	0	0	0	1.35	0.5375	1.01149	0.398148	0.393625	5.5	1.05	2.5	1.88	1.525	Suntivich (2011)@ 0.5 mA/cm2
10	9	LaMn0.5Ni0.5O3	La3+	3	1.1	1.36	1	0	0	0	0	0	Mn3+	4	1.55	0.58	0.5	Ni3+	7	1.91	0.56	0.5	0	0	0	0	0	0	0	0	0	0	1.36	0.57	0.998052	0.422222	0.423046	5.5	1.1	3	1.73	1.572	Suntivich (2011)@ 0.5 mA/cm2
10	10	La0.75Ca0.25FeO3	La3+	3	1.1	1.36	0.75	Ca2+	2	1	1.34	0.25	Fe3+	5	1.83	0.55	0.75	Fe4+	4	1.83	0.52	0.25	0	0	0	0	0	0	0	0	0	0	1.355	0.5425	1.01069	0.401852	0.397603	4.75	1.075	2.75	1.83	1.592	Suntivich (2011)@ 0.5 mA/cm2
10	11	LaFeO3	La3+	3	1.1	1.36	1	0	0	0	0	0	Fe3+	5	1.83	0.55	1	0	0	0	0	0	0	0	0	0	0	0	0	0	0	0	1.36	0.55	1.00856	0.407407	0.403951	5	1.1	3	1.83	1.611	Suntivich (2011)@ 0.5 mA/cm2
10	12	La0.5Ca0.5FeO3	La3+	3	1.1	1.36	0.5	Ca2+	2	1	1.34	0.5	Fe3+	5	1.83	0.55	0.5	Fe4+	4	1.83	0.52	0.5	0	0	0	0	0	0	0	0	0	0	1.35	0.535	1.01283	0.396296	0.391275	4.5	1.05	2.5	1.83	1.54	Suntivich (2011)@ 0.5 mA/cm2
11	1	La0.6Sr0.4FeO3-δ	La3+	3	1.1	1.36	0.6	Sr2+	2	0.95	1.44	0.4	Fe3+	5	1.83	0.55	0.6	Fe4+	4	1.83	0.52	0.4	0	0	0	0	0	0	0	0	0	0	1.392	0.538	1.02695	0.398519	0.388059	4.6	1.04	2.6	1.83	1.661	Wang(2018)@ 10 mA/cm2
11	2	La0.6Sr0.4Co0.2Fe0.8O3-δ	La3+	3	1.1	1.36	0.6	Sr2+	2	0.95	1.44	0.4	Fe3+	5	1.83	0.55	0.48	Co3+	6	1.88	0.545	0.12	Fe4+	4	1.83	0.52	0.32	Co4+	5	1.88	0.53	0.08	1.392	0.5382	1.02684	0.398667	0.388245	4.8	1.04	2.6	1.84	1.624	Wang(2018)@ 10 mA/cm2
11	3	La0.6Sr0.4Co0.4Fe0.6O3-δ	La3+	3	1.1	1.36	0.6	Sr2+	2	0.95	1.44	0.4	Fe3+	5	1.83	0.55	0.36	Co3+	6	1.88	0.545	0.24	Fe4+	4	1.83	0.52	0.24	Co4+	5	1.88	0.53	0.16	1.392	0.5384	1.02674	0.398815	0.38843	5	1.04	2.6	1.85	1.614	Wang(2018)@ 10 mA/cm2
11	4	La0.6Sr0.4Co0.6Fe0.4O3-δ	La3+	3	1.1	1.36	0.6	Sr2+	2	0.95	1.44	0.4	Fe3+	5	1.83	0.55	0.24	Co3+	6	1.88	0.545	0.36	Fe4+	4	1.83	0.52	0.16	Co4+	5	1.88	0.53	0.24	1.392	0.5386	1.02663	0.398963	0.388615	5.2	1.04	2.6	1.86	1.603	Wang(2018)@ 10 mA/cm2
11	5	La0.6Sr0.4Co0.8Fe0.2O3-δ	La3+	3	1.1	1.36	0.6	Sr2+	2	0.95	1.44	0.4	Fe3+	5	1.83	0.55	0.12	Co3+	6	1.88	0.545	0.48	Fe4+	4	1.83	0.52	0.08	Co4+	5	1.88	0.53	0.32	1.392	0.5388	1.02652	0.399111	0.388801	5.4	1.04	2.6	1.87	1.586	Wang(2018)@ 10 mA/cm2
11	6	La0.6Sr0.4CoO3-δ	La3+	3	1.1	1.36	0.6	Sr2+	2	0.95	1.44	0.4	Co3+	6	1.88	0.545	0.6	Co4+	5	1.88	0.53	0.4	0	0	0	0	0	0	0	0	0	0	1.392	0.539	1.02641	0.399259	0.388986	5.6	1.04	2.6	1.88	1.652	Wang(2018)@ 10 mA/cm2
12	1	LaCoO3	La3+	3	1.1	1.36	1	0	0	0	0	0	Co3+	6	1.88	0.545	1	0	0	0	0	0	0	0	0	0	0	0	0	0	0	0	1.36	0.545	1.01122	0.403704	0.399225	6	1.1	3	1.88	4.35466	Mefford(2016)@ 1.63 V vs. RHE
12	2	La0.8Sr0.2CoO3	La3+	3	1.1	1.36	0.8	Sr2+	2	0.95	1.44	0.2	Co3+	6	1.88	0.545	0.8	Co4+	5	1.88	0.53	0.2	0	0	0	0	0	0	0	0	0	0	1.376	0.542	1.0188	0.401481	0.394072	5.8	1.07	2.8	1.88	7.84582	Mefford(2016)@ 1.63 V vs. RHE
12	3	La0.6Sr0.4CoO3	La3+	3	1.1	1.36	0.6	Sr2+	2	0.95	1.44	0.4	Co3+	6	1.88	0.545	0.6	Co4+	5	1.88	0.53	0.4	0	0	0	0	0	0	0	0	0	0	1.392	0.539	1.02641	0.399259	0.388986	5.6	1.04	2.6	1.88	11.708	Mefford(2016)@ 1.63 V vs. RHE
12	4	La0.4Sr0.6CoO3	La3+	3	1.1	1.36	0.4	Sr2+	2	0.95	1.44	0.6	Co3+	6	1.88	0.545	0.4	Co4+	5	1.88	0.53	0.6	0	0	0	0	0	0	0	0	0	0	1.408	0.536	1.03404	0.397037	0.383967	5.4	1.01	2.4	1.88	12.5831	Mefford(2016)@ 1.63 V vs. RHE
12	5	La0.2Sr0.8CoO3	La3+	3	1.1	1.36	0.2	Sr2+	2	0.95	1.44	0.8	Co3+	6	1.88	0.545	0.2	Co4+	5	1.88	0.53	0.8	0	0	0	0	0	0	0	0	0	0	1.424	0.533	1.0417	0.394815	0.379011	5.2	0.98	2.2	1.88	16.8068	Mefford(2016)@ 1.63 V vs. RHE
12	6	SrCoO3						Sr2+	2	0.95	1.44	1						Co4+	5	1.88	0.53	1	0	0	0	0	0	0	0	0	0	0	1.44	0.53	1.04938	0.392593	0.37412	5	0.95	2	1.88	28.3837	Mefford(2016)@ 1.63 V vs. RHE
13	1	La0.6Sr0.4FeO3	La3+	3	1.1	1.36	0.6	Sr2+	2	0.95	1.44	0.4	Fe3+	5	1.83	0.55	0.6	Fe4+	4	1.83	0.52	0.4	0	0	0	0	0	0	0	0	0	0	1.392	0.538	1.02695	0.398519	0.388059	4.6	1.04	2.6	1.83	-11.0458	Wattiaux(1987)
13	2	La0.4Sr0.6FeO3	La3+	3	1.1	1.36	0.4	Sr2+	2	0.95	1.44	0.6	Fe3+	5	1.83	0.55	0.44	Fe4+	4	1.83	0.52	0.56	0	0	0	0	0	0	0	0	0	0	1.408	0.5332	1.03558	0.394963	0.381394	4.44	1.01	2.4	1.83	-10.9208	Wattiaux(1987)
13	3	La0.2Sr0.8FeO3	La3+	3	1.1	1.36	0.2	Sr2+	2	0.95	1.44	0.8	Fe3+	5	1.83	0.55	0.39	Fe4+	4	1.83	0.52	0.61	0	0	0	0	0	0	0	0	0	0	1.424	0.5317	1.04242	0.393852	0.377826	4.39	0.98	2.2	1.83	-12.3565	Wattiaux(1987)
13	4	La0.1Sr0.9FeO3	La3+	3	1.1	1.36	0.1	Sr2+	2	0.95	1.44	0.9	Fe3+	5	1.83	0.55	0.32	Fe4+	4	1.83	0.52	0.68	0	0	0	0	0	0	0	0	0	0	1.432	0.5296	1.04659	0.392296	0.374833	4.32	0.965	2.1	1.83	-10.699	Wattiaux(1987)
13	5	La0.05Sr0.95FeO3	La3+	3	1.1	1.36	0.05	Sr2+	2	0.95	1.44	0.95	Fe3+	5	1.83	0.55	0.42	Fe4+	4	1.83	0.52	0.58	0	0	0	0	0	0	0	0	0	0	1.436	0.5326	1.04642	0.394519	0.377016	4.42	0.9575	2.05	1.83	-11.9208	Wattiaux(1987)
14	1	CaVO3	Ca2+	2	1	1.34	1	0	0	0	0	0	V4+	1	1.63	0.58	1	0	0	0	0	0	0	0	0	0	0	0	0	0	0	0	1.34	0.58	0.985553	0.42963	0.435927	1	1	2	1.63	0.49	Yamada(2018)@0.05 mA/cm2
14	2	CaMnO3	Ca2+	2	1	1.34	1	0	0	0	0	0	Mn4+	3	1.55	0.53	1	0	0	0	0	0	0	0	0	0	0	0	0	0	0	0	1.34	0.53	1.01176	0.392593	0.388028	3	1	2	1.55	0.54	Yamada(2018)@0.05 mA/cm2
14	3	CaFeO3	Ca2+	2	1	1.34	1	0	0	0	0	0	Fe4+	4	1.83	0.52	1	0	0	0	0	0	0	0	0	0	0	0	0	0	0	0	1.34	0.52	1.01717	0.385185	0.378681	4	1	2	1.83	0.34	Yamada(2018)@0.05 mA/cm2
14	4	CaCoO3	Ca2+	2	1	1.34	1	0	0	0	0	0	Co4+	5	1.88	0.53	1	0	0	0	0	0	0	0	0	0	0	0	0	0	0	0	1.34	0.53	1.01176	0.392593	0.388028	5	1	2	1.88	0.37	Yamada(2018)@0.05 mA/cm2
14	5	SrCrO3	Sr2+	2	0.95	1.44	1	0	0	0	0	0	Cr4+	2	1.66	0.55	1	0	0	0	0	0	0	0	0	0	0	0	0	0	0	0	1.44	0.55	1.03833	0.407407	0.392368	2	0.95	2	1.66	0.48	Yamada(2018)@0.05 mA/cm2
14	6	SrMnO3	Sr2+	2	0.95	1.44	1	0	0	0	0	0	Mn4+	3	1.55	0.53	1	0	0	0	0	0	0	0	0	0	0	0	0	0	0	0	1.44	0.53	1.04938	0.392593	0.37412	3	0.95	2	1.55	0.36	Yamada(2018)@0.05 mA/cm2
14	7	SrFeO3	Sr2+	2	0.95	1.44	1	0	0	0	0	0	Fe4+	4	1.83	0.52	1	0	0	0	0	0	0	0	0	0	0	0	0	0	0	0	1.44	0.52	1.05499	0.385185	0.365109	4	0.95	2	1.83	0.33	Yamada(2018)@0.05 mA/cm2
14	8	SrCoO3	Sr2+	2	0.95	1.44	1	0	0	0	0	0	Co4+	5	1.88	0.53	1	0	0	0	0	0	0	0	0	0	0	0	0	0	0	0	1.44	0.53	1.04938	0.392593	0.37412	5	0.95	2	1.88	0.33	Yamada(2018)@0.05 mA/cm2
14	9	YMnO3	Y3+	3	1.22	1.25	1	0	0	0	0	0	Mn4+	3	1.55	0.53	1	0	0	0	0	0	0	0	0	0	0	0	0	0	0	0	1.25	0.53	0.977914	0.392593	0.401459	3	1.22	3	1.55	0.56	Yamada(2018)@0.05 mA/cm2
14	10	YFeO3	Y3+	3	1.22	1.25	1	0	0	0	0	0	Fe4+	4	1.83	0.52	1	0	0	0	0	0	0	0	0	0	0	0	0	0	0	0	1.25	0.52	0.983143	0.385185	0.39179	4	1.22	3	1.83	0.5	Yamada(2018)@0.05 mA/cm2
14	11	YCoO3	Y3+	3	1.22	1.25	1	0	0	0	0	0	Co4+	5	1.88	0.53	1	0	0	0	0	0	0	0	0	0	0	0	0	0	0	0	1.25	0.53	0.977914	0.392593	0.401459	5	1.22	3	1.88	0.39	Yamada(2018)@0.05 mA/cm2
14	12	YNiO3	Y3+	3	1.22	1.25	1	0	0	0	0	0	Ni4+	6	1.91	0.48	1	0	0	0	0	0	0	0	0	0	0	0	0	0	0	0	1.25	0.48	1.00463	0.355556	0.353916	6	1.22	3	1.91	0.41	Yamada(2018)@0.05 mA/cm2
14	13	LaMnO3	La3+	3	1.1	1.36	1	0	0	0	0	0	Mn4+	3	1.55	0.53	1	0	0	0	0	0	0	0	0	0	0	0	0	0	0	0	1.36	0.53	1.01929	0.392593	0.385164	3	1.1	3	1.55	0.51	Yamada(2018)@0.05 mA/cm2
14	14	LaFeO3	La3+	3	1.1	1.36	1	0	0	0	0	0	Fe4+	4	1.83	0.52	1	0	0	0	0	0	0	0	0	0	0	0	0	0	0	0	1.36	0.52	1.02474	0.385185	0.375887	4	1.1	3	1.83	0.41	Yamada(2018)@0.05 mA/cm2
14	15	LaCoO3	La3+	3	1.1	1.36	1	0	0	0	0	0	Co4+	5	1.88	0.53	1	0	0	0	0	0	0	0	0	0	0	0	0	0	0	0	1.36	0.53	1.01929	0.392593	0.385164	5	1.1	3	1.88	0.4	Yamada(2018)@0.05 mA/cm2
14	16	LaNiO3	La3+	3	1.1	1.36	1	0	0	0	0	0	Ni4+	6	1.91	0.48	1	0	0	0	0	0	0	0	0	0	0	0	0	0	0	0	1.36	0.48	1.04714	0.355556	0.33955	6	1.1	3	1.91	0.37	Yamada(2018)@0.05 mA/cm2
14	17	SrMn0.5Fe0.5O3	Sr2+	2	0.95	1.44	1	0	0	0	0	0	Mn4+	3	1.55	0.53	0.5	Fe4+	4	1.83	0.52	0.5	0	0	0	0	0	0	0	0	0	0	1.44	0.525	1.05217	0.388889	0.369605	3.5	0.95	2	1.69	0.37	Yamada(2018)@0.05 mA/cm2
14	18	Sr0.5La0.5FeO3	La3+	3	1.1	1.36	0.5	Sr2+	2	0.95	1.44	0.5	Fe3+	5	1.83	0.55	0.5	Fe4+	4	1.83	0.52	0.5	0	0	0	0	0	0	0	0	0	0	1.4	0.535	1.03159	0.396296	0.384161	4.5	1.025	2.5	1.83	0.35	Yamada(2018)@0.05 mA/cm2
14	19	CaMn0.5Fe0.5O3	Ca2+	2	1	1.34	1	0	0	0	0	0	Mn4+	3	1.55	0.53	0.5	Fe4+	4	1.83	0.52	0.5	0	0	0	0	0	0	0	0	0	0	1.34	0.525	1.01446	0.388889	0.383345	3.5	1	2	1.69	0.37	Yamada(2018)@0.05 mA/cm2
14	20	Ca0.5La0.5FeO3	La3+	3	1.1	1.36	0.5	Ca2+	2	1	1.34	0.5	Fe3+	5	1.83	0.55	0.5	Fe4+	4	1.83	0.52	0.5	0	0	0	0	0	0	0	0	0	0	1.35	0.535	1.01283	0.396296	0.391275	4.5	1.05	2.5	1.83	0.35	Yamada(2018)@0.05 mA/cm2
14	21	Sr0.5La0.5MnO3	La3+	3	1.1	1.36	0.5	Sr2+	2	0.95	1.44	0.5	Mn3+	4	1.55	0.58	0.5	Mn4+	3	1.88	0.53	0.5	0	0	0	0	0	0	0	0	0	0	1.4	0.555	1.02076	0.411111	0.402751	3.5	1.025	2.5	1.715	0.44	Yamada(2018)@0.05 mA/cm2
14	22	LaMn0.5Fe0.5O3	La3+	3	1.1	1.36	1	0	0	0	0	0	Fe3+	5	1.83	0.55	0.5	Mn3+	4	1.55	0.58	0.5	0	0	0	0	0	0	0	0	0	0	1.36	0.565	1.00066	0.418519	0.418243	4.5	1.1	3	1.69	0.49	Yamada(2018)@0.05 mA/cm2
15	1	NBCC	Nd2+	3	1.14	1.53	0.5	Ba2+/Ca2+	2	0.9175	1.5425	0.5	Co3+	6	1.88	0.545	1	0	0	0	0	0	0	0	0	0	0	0	0	0	0	0	1.53625	0.545	1.07699	0.403704	0.374846	6	1.02875	2.5	1.88	1.652	Kim(2018)@10 mA/cm2
15	2	NBCCFe	Nd2+	3	1.14	1.53	0.5	Ba2+/Ca2+	2	0.9175	1.5425	0.5	Co3+	6	1.88	0.545	0.5	Fe3+	5	1.83	0.55	0.5	0	0	0	0	0	0	0	0	0	0	1.53625	0.5475	1.07557	0.405556	0.377062	5.5	1.02875	2.5	1.855	1.627	Kim(2018)@10 mA/cm2
15	3	NBCCMn	Nd2+	3	1.14	1.53	0.5	Ba2+/Ca2+	2	0.9175	1.5425	0.5	Co3+	6	1.88	0.545	0.5	Mn3+	4	1.55	0.58	0.5	0	0	0	0	0	0	0	0	0	0	1.53625	0.5625	1.06713	0.416667	0.390455	5	1.02875	2.5	1.715	1.634	Kim(2018)@10 mA/cm2
15	4	NBCCNi	Nd2+	3	1.14	1.53	0.5	Ba2+/Ca2+	2	0.9175	1.5425	0.5	Co3+	6	1.88	0.545	0.5	Ni3+	7	1.91	0.56	0.5	0	0	0	0	0	0	0	0	0	0	1.53625	0.5525	1.07274	0.409259	0.381509	6.5	1.02875	2.5	1.895	1.637	Kim(2018)@10 mA/cm2
15	5	NBCCCu	Nd2+	3	1.14	1.53	0.5	Ba2+/Ca2+	2	0.9175	1.5425	0.5	Co3+	6	1.88	0.545	0.5	Cu3+	2	1.63	0.54	0.5	0	0	0	0	0	0	0	0	0	0	1.53625	0.5425	1.07841	0.401852	0.372634	4	1.02875	2.5	1.755	1.683	Kim(2018)@10 mA/cm2
16	1	LaNiO3	La3+	3	1.1	1.36	1						Ni3+	7	1.91	0.56	1	0	0	0	0	0	0	0	0	0	0	0	0	0	0	0	1.36	0.56	1.00328	0.414815	0.41346	7	1.1	3	1.91	0.426	Guo(2019)@10 mA/cm2
16	2	LaNi0.5Fe0.5O3	La3+	3	1.1	1.36	1	0	0	0	0	0	Ni3+	7	1.91	0.56	0.5	Fe3+	5	1.83	0.55	0.5	0	0	0	0	0	0	0	0	0	0	1.36	0.555	1.00591	0.411111	0.408696	6	1.1	3	1.87	0.34	Guo(2019)@10 mA/cm2
16	3	La0.4Sr0.6Ni0.5Fe0.5O3	La3+	3	1.1	1.36	0.4	Sr2+	2	0.95	1.44	0.6	Fe3+	5	1.83	0.55	0.32	Co3+	6	1.88	0.545	0.08	Fe4+	4	1.83	0.52	0.48	Co4+	5	1.88	0.53	0.12	1.408	0.5328	1.0358	0.394667	0.381027	4.6	1.01	2.4	1.84	0.32	Guo(2019)@10 mA/cm2
16	4	LaFeO3	La3+	3	1.1	1.36	1	0	0	0	0	0	Fe3+	5	1.83	0.55	1	0	0	0	0	0	0	0	0	0	0	0	0	0	0	0	1.36	0.55	1.00856	0.407407	0.403951	5	1.1	3	1.83	0.473	Guo(2019)@10 mA/cm2
		Elements	Radius(Å)[1]		χ[2]	Nd	Valence				[1] http://abulafia.mt.ic.ac.uk/shannon/radius.php
		La3+	1.36		1.1		3				[2] https://en.wikipedia.org/wiki/Electronegativity
		Pr3+	1.37*		1.13		3				*Obtained by Interpolation method (Pr3+ Coordination:6(Radius:0.99), 9(Radius:1.179), 12 (Radius:1.179 + 1.179 - 0.99 = 1.368))
		Sr2+	1.44		0.95		2
		Ba2+	1.61		0.89		2
		Cs1+	1.88		0.79		1
		Ca2+	1.34		1		2
		Fe3+	0.55		1.83	5
		Fe4+	0.52		1.83	4
		Mn3+	0.58		1.55	4
		Mn4+	0.53		1.55	3
		Ni3+	0.56		1.91	7
		Ni4+	0.48		1.91	6
		Co3+	0.545		1.88	6
		Co4+	0.53		1.88	5
		Ti3+	0.67		1.54	1
		Ti4+	0.605		1.54	0
		V3+	0.64		1.63	2
		V4+	0.58		1.63	1
		Cr3+	0.615		1.66	3
		Cr4+	0.55		1.66	2
		Ru3+	0.68		2.2	5
		Ru4+	0.62		2.2	4
		Ga3+	0.62		1.81	7
		Ge4+	0.53		2.01	6
		Cu3+	0.54		1.9	8
		Cu2+	0.65		1.9	9
		Gd3+	1.276		1.2	5
		Sm3+	1.24		1.17	3
		Ho3+	1.243		1.23	8
		Ce3+	1.34		1.12
		Ce4+	1.34		1.12
		Nd3+	1.27		1.14
		Y3+	1.25		1.22
